# Supplementary material
Source: Springer Nature journal article supplement (https://www.springermedizin.de/resource/supplementary/13037_2013_160_MOESM1_ESM.docx/9659440)
Supplement: MOESM1 [file 9659440]

**Figure 1.** Mean differences between participants’ rating of support of the checklist by their own group and their ratings of the support of other groups (error bars represent one standard deviation).
